# Supplementary material
Source: MDPI journal article supplement (https://www.mdpi.com/2079-9284/10/3/81)
Supplement: s1 [file s1]

### **Extraction Protocol**

- 1) weighing of the lyophilised sample;
- 2) addition of chloroform with a ratio of 50-60 mL per gram of sample organic matter and manual stirring;
- 3) extraction overnight at room temperature (25-27 °C);
- 4) filtration on paper to separate the sample solids and washing with half of the solvent volume used for extraction;
- 5) drying of the sample solid residue under the cabinet;
- 6) addition of water:ethanol 70:30 at the same ratio as for chloroform and manual stirring;
- 7) extraction overnight;
- 8) filtration on paper with half of the solvent volume used for extraction;
- 9) solvent evaporation under vacuum with the water bath set at 35°C;
- 10) resuspension of the dry residue of chloroform extracted sample in methanol (lipophilic extracts) and of ethanol:water 70:30 extracted sample in the extraction solvent (hydrophilic extract) to reach an extract concentration of 100 g of extracted material per liter for biogeochemical and isolated strain biomasses and 1000 g of extracted material per liter for mud samples (about 100 g of extracted organic matter per liter).

**Table S1.** Relation between isolated strains and on-site communities. Cyanobacterial and microalgal strains isolated from samples collected from different thermal spring sites and relevance to or correspondence with components of the phototrophic population of the sampling site.

| strain | genus/species                                | correspondence to natural sample populations                                                                 |
|--------|----------------------------------------------|--------------------------------------------------------------------------------------------------------------|
| BIOG1  | <i>Leptolyngbya</i> sp.                      | Minor component of Saturnia pool bioglea                                                                     |
| BIOG2  | <i>Leptolyngbya</i> sp.                      | Major component of Saturnia pool bioglea (cf. <i>Leptolyngbya</i> sp. 1)                                     |
| BIOG3  | <i>Chroococciopsis</i> sp.                   | Minor component of Saturnia pool bioglea                                                                     |
| BIOG4  | <i>Leptolyngbya</i> sp.                      | Minor component of Saturnia pool bioglea and mat                                                             |
| BIOG5  | <i>Spirulina</i> cf. <i>labyrinthiformis</i> | Major component of Saturnia pool and canal bioglea                                                           |
| BIOG6  | <i>Oscillatoria</i> sp.                      | Component at low densities of Saturnia pool bioglea ( <i>Oscillatoria</i> sp. 1)                             |
| BIOG7  | <i>Leptolyngbya</i> sp.                      | Minor component of Saturnia pool bioglea                                                                     |
| TSAT1  | <i>Chroococcus</i> sp.                       | Major component of Saturnia mat                                                                              |
| TSAT2  | <i>Synechococcus</i> sp.                     | Component of Saturnia pool bioglea, occasionally at high densities, and of thermal mud populations           |
| TPET1  | <i>Oscillatoria</i> sp.                      | Component of Terme di Petriolo bioglea                                                                       |
| TPET2  | <i>Leptolyngbya</i> sp.                      | Major component of Terme di Petriolo bioglea                                                                 |
| BdR1   | <i>Leptolyngbya</i> sp.                      | Major component of Bagno di Romagna oxygenic phototrophic community of cultivated bioglea                    |
| BdR2   | <i>Leptolyngbya</i> sp.                      | Minor component of Bagno di Romagna oxygenic phototrophic community of cultivated bioglea                    |
| BdR3   | <i>Nannochloris</i> sp.                      | Major component of Bagno di Romagna oxygenic phototrophic community of cultivated bioglea and of thermal mud |
| Dx1    | <i>Chroococcus minutus</i>                   | Component of Dax cultivated bioglea                                                                          |
| Dx2    | <i>Phormidium</i> sp.                        | Component of Dax cultivated bioglea                                                                          |
| Dx3    | <i>Chlorogleopsis</i> sp.                    | Component of Dax cultivated bioglea                                                                          |
| Dx4    | <i>Tolypothrix</i> sp.                       | Component of Dax cultivated bioglea                                                                          |

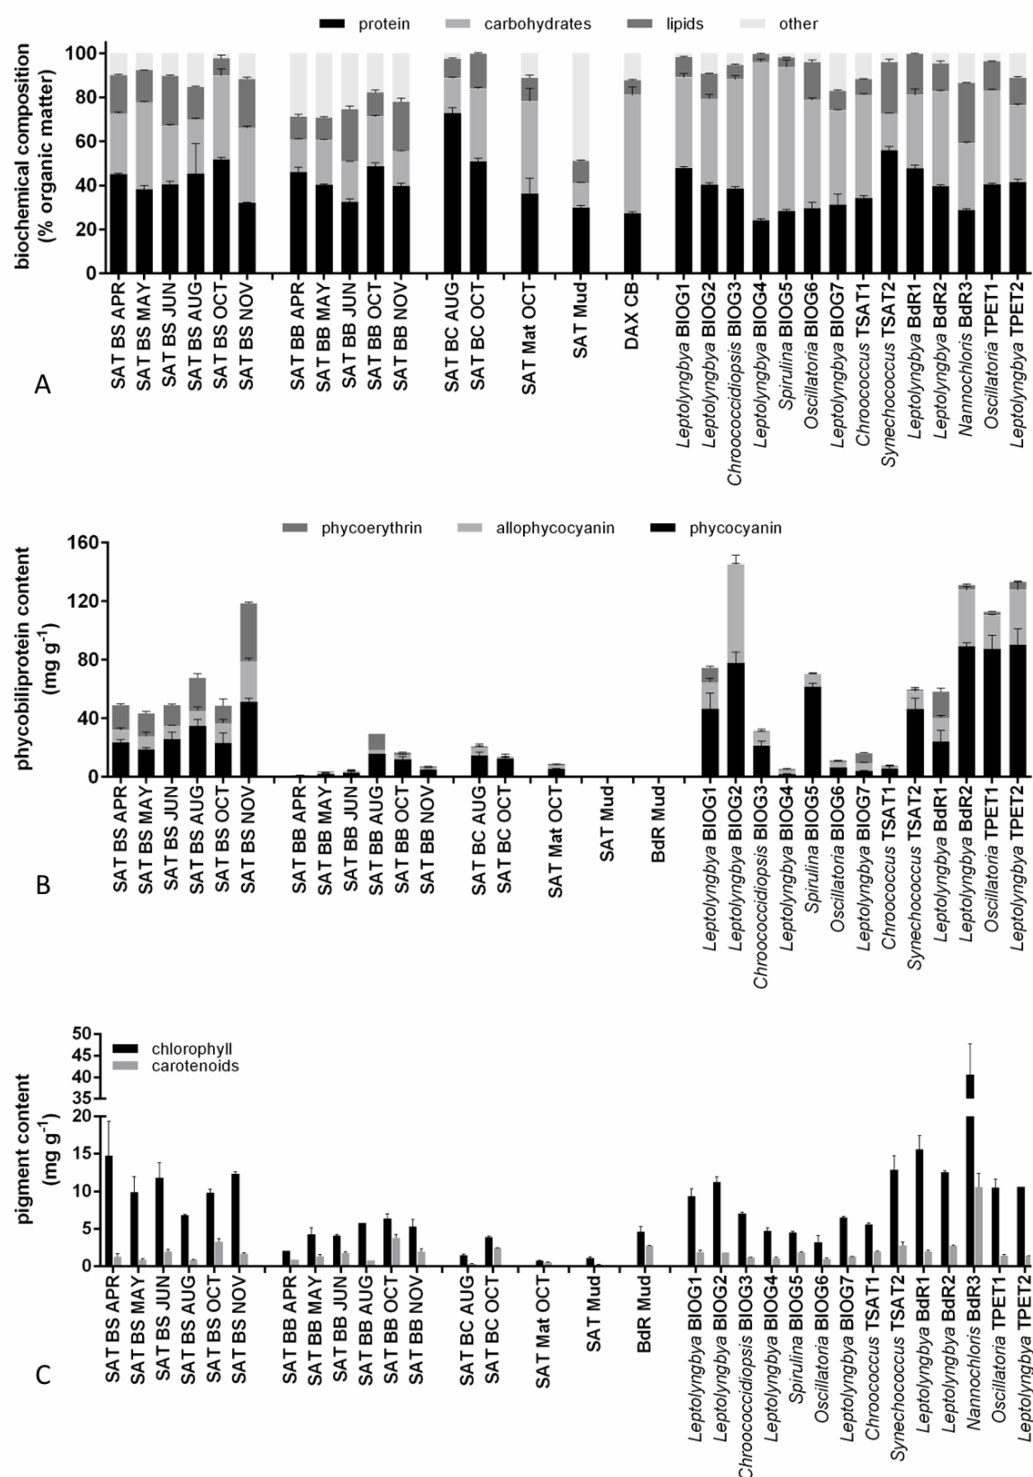

**Figure S1.** Biochemical composition (A), phycobiliprotein (B), and chlorophyll and carotenoid (C) content in hot spring microbial communities samples and of the isolated strains. Sample names indicate sampling spa (SAT, Saturnia spa; BdR, Bagno di Romagna spa; DAX, Dax thermal area), location of sampling within the spa (BS, surface *bioglea*; BB, bottom *bioglea*; BC, canal *bioglea*; Mat, coriaceous microbial mat; Mud, thermal mud; CB, cultivated *bioglea*) and, where needed, month of sampling (APR, April; JUN, June; AUG, August; OCT, October; NOV, November).

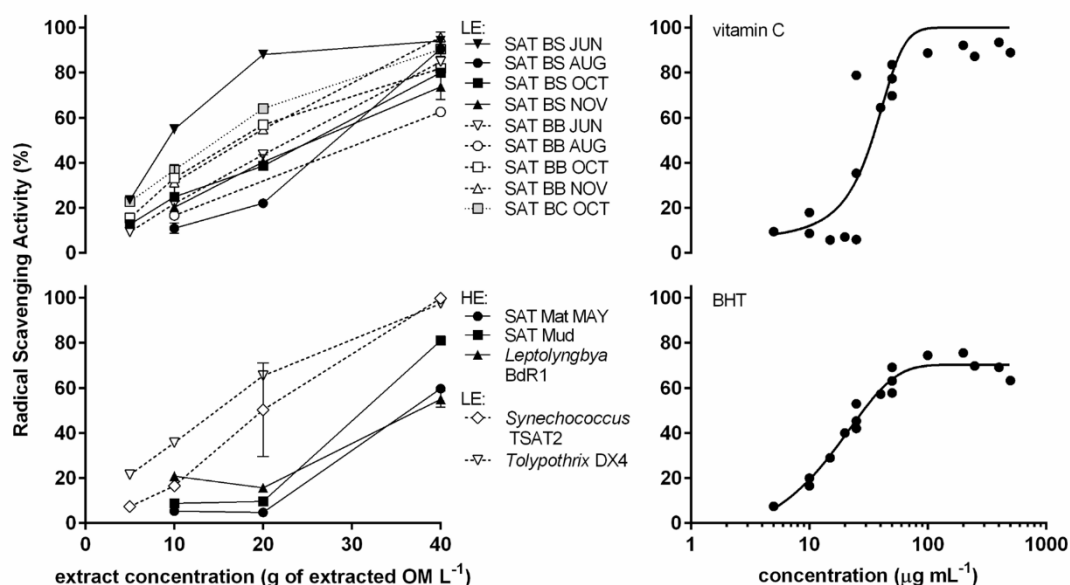

**Figure S2.** Dose response curves for radical scavenging activity with DPPH assay. Two positive standards, vitamin C and BHT, as well as extracts that showed an activity >50% during the screening were diluted to obtain dose-response curves. OM, organic matter; LE, lipophilic extract; HE, hydrophilic extract. Sample names indicate sampling spa (SAT, Saturnia spa), location of sampling within the spa (BS, surface *bioglea*; BB, bottom *bioglea*; BC, canal *bioglea*; Mat, coriaceous microbial mat; Mud, thermal mud) and, where needed, month of sampling (JUN, June; AUG, August, OCT, October; NOV, November).

**Table S2.** Equations of the regressions used to calculate IC<sub>50</sub> values for radical scavenging activity determined with DPPH assay. The IC<sub>50</sub> values were calculated for the extracts reported in Figure S2. In the regressions,  $y$  represents radical scavenging activity and  $x$  extract concentration.

| Extract                     | Linear regression parameters     |
|-----------------------------|----------------------------------|
| <i>Lipophilic extracts</i>  |                                  |
| SAT BS JUN                  | $y = 4.2x + 6.9$ ; $R^2 = 0.97$  |
| SAT BS AUG                  | $y = 2.3x - 23.9$ ; $R^2 = 0.97$ |
| SAT BS OCT                  | $y = 1.9x + 3.7$ ; $R^2 = 0.99$  |
| SAT BS NOV                  | $y = 2.2x - 13.0$ ; $R^2 = 0.86$ |
| SAT BB JUN                  | $y = 2.3x - 1.6$ ; $R^2 = 1.00$  |
| SAT BB AUG                  | $y = 1.5x - 1.4$ ; $R^2 = 1.00$  |
| SAT BB OCT                  | $y = 1.8x + 12.8$ ; $R^2 = 0.95$ |
| SAT BB NOV                  | $y = 2.1x + 11.0$ ; $R^2 = 1.00$ |
| SAT BC OCT                  | $y = 1.9x + 17.9$ ; $R^2 = 0.96$ |
| <i>Synechococcus</i> TSAT2  | $y = 3.4x - 12.9$ ; $R^2 = 0.99$ |
| <i>Tolypothrix</i> Dx4      | $y = 2.1x - 14.8$ ; $R^2 = 0.97$ |
| <i>Hydrophilic extracts</i> |                                  |
| SAT Mat MAY                 | $y = 2.7x - 50.0$ ; $R^2 = 0.89$ |
| SAT Mud                     | $y = 2.6x - 26.8$ ; $R^2 = 0.90$ |
| <i>Leptolyngbya</i> BdR1    | $y = 2.0x - 23.5$ ; $R^2 = 1.00$ |
| <i>Positive controls</i>    |                                  |
| Vitamin C                   | $y = 1.6x - 2.9$ ; $R^2 = 0.97$  |
| BHT                         | $y = 1.1x + 10.5$ ; $R^2 = 0.88$ |

Sample names indicate sampling spa (SAT, Saturnia spa), location of sampling within the spa (BS, surface *bioglea*; BB, bottom *bioglea*; BC, canal *bioglea*; Mat, coriaceous microbial mat; Mud, thermal mud) and, where needed, month of sampling (JUN, June; AUG, August, OCT, October; NOV, November).

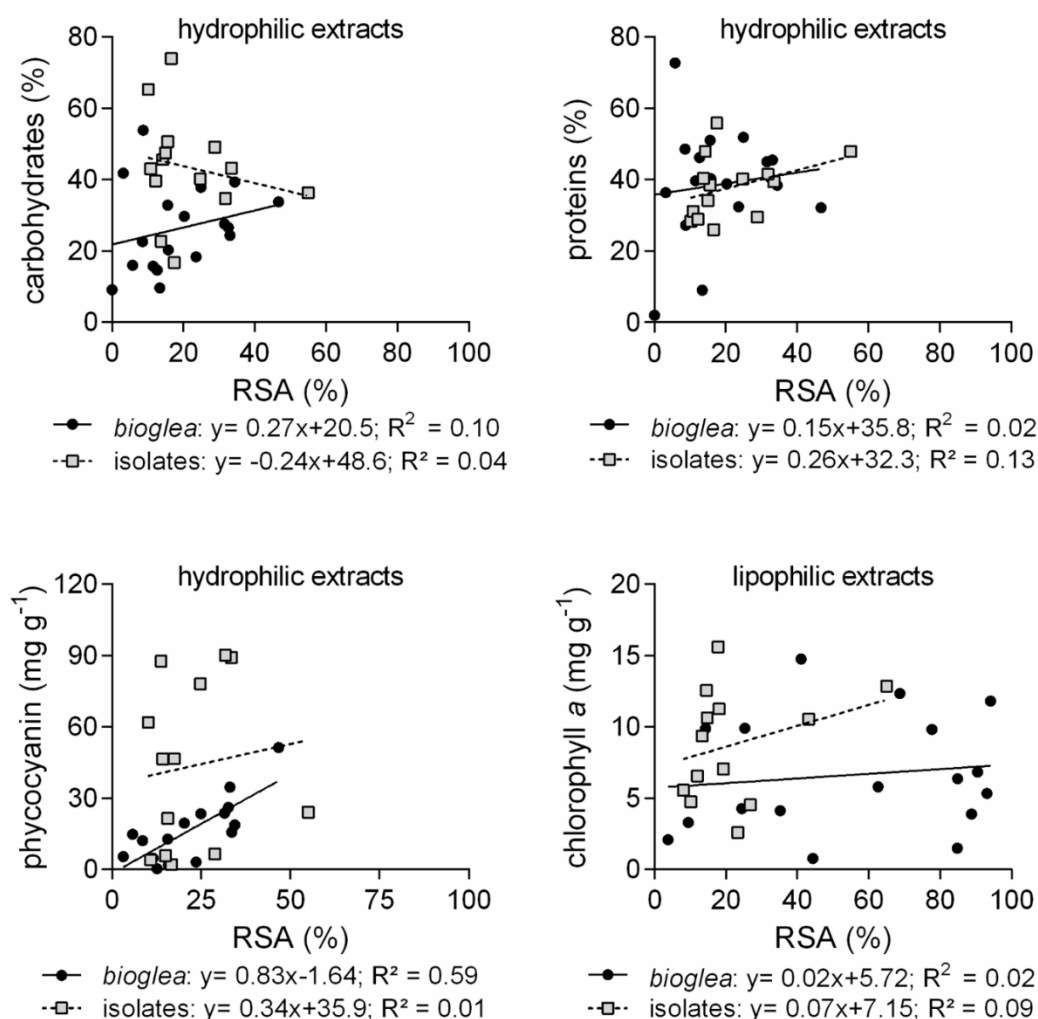

**Figure S3.** Linear regressions between components of *bioglea*/isolate biomasses and radical scavenging activity (RSA) of lipophilic and hydrophilic extracts. Equations of the interpolated lines are also reported together with the  $R^2$  value. Correlation analysis: hydrophilic extract RSA vs carbohydrate and vs protein–*bioglea*,  $P > 0.05$ ,  $n = 18$ – isolates,  $P > 0.05$ ,  $n = 14$ ; hydrophilic extract RSA vs phycocyanin– *bioglea*,  $P < 0.001$ ,  $n = 16$ – isolates,  $P > 0.05$ ,  $n = 13$ ; lipophilic extract RSA vs chlorophyll *a*– *bioglea*,  $P > 0.05$ ,  $n = 17$ – isolates,  $P > 0.05$ ,  $n = 13$ .
